# Supplementary material
Source: PubMed Central journal article supplement (PMC6721946)
Supplement: supp_RA119.009016_144843_2_supp_363396_pbp72b.pdf [file supp_RA119.009016_144843_2_supp_363396_pbp72b.pdf]

**Table S1. sGC $\beta$ 1 mutants, expression vectors, and DNA primers used in this study.**

|                                     | <b>Vector<br/>Mutant</b> | <b>pCMV5, pET20b (rat sGC, rat TC-sGC)</b>                                      | <b>pMAL (bovine sGC)</b>                                              |
|-------------------------------------|--------------------------|---------------------------------------------------------------------------------|-----------------------------------------------------------------------|
| <b>PAS domain mutants</b>           | $\Delta$ 284-301         | CTTTGTA CTGAGAAGCAAGGAAGGGAGCTGC<br>CTCCGTCTCAAAGGCCAAA                         | GAGAAGCAAGGAAGGGAGCTGCTTACGGCTCA                                      |
|                                     | $\Delta$ 265-271         | CTCTCTGGTCCGCCCTCATATTGACATCAGTAT<br>CAATACCGTCTTTGTA CTGAGAAGCAAGG             | CGTCCTCATATTGACATCAGTATCAATACAGTCTTC<br>GTGTTG                        |
|                                     | R335S/R336S/D342S        | CTTGATGACCTAACAAGCAGCGGCCTGTACC<br>TGAGTAGCATCCCTCTCCATGATG                     | CCTGGACGACCTGACCAGCAGCGGGCTGTACCTGA<br>GTAGCATCCCTCTGCACGATG          |
|                                     | L340D/I343D/L345D        | CCTAACAAGAAGAGGGCCTGTACGATAGTGACG<br>ACCCTGACCATGATGCTACACGAGACCTG              | ACCCGGCGAGGGCTGTACGATAGTGACGACCCTG<br>ATCACGATGCCACTCGGGAC            |
|                                     | H266A/H271A/I272D        | CCTCATATTGACATCAGTTTCGCCGGGATTCTT<br>TCAGCCGACAATACCGTCTTTGTA CTGAGAAG          | CCTCATATTGACATCAGTTTCGCTGGAATCCTCTCA<br>GCCGACAATACAGTCTTCGTGTTGAGAAG |
|                                     | L269D/I272S/V275D        | TCAGTTTCCACGGGATTGATTCACACAGCAATA<br>CCGACTTTGTA CTGAGAAGCA                     | TCAGTTTCCATGGAATCGACTCACACAGCAATACA<br>GACTTCGTGTTGAGAAGCA            |
|                                     | E291A/E295A/L296D        | CTGGATGTTGAGAACTTGCATGTGAGGATGC<br>AGATACTGGGGCAGAGATTAGCTG                     | GGATGTAGAGAAATCAGCGTGTGAGGATGCGGAT<br>ACGGGCACTGAAATCAGCTGC           |
|                                     | L333D/L338D/L340D        | AGTGTGATGAACTTGGATGACGATACAAGAA<br>GAGGCGATTACGATAGTGACATCCCTCTCCAT<br>GATGCTAC | ATGAACCTGGACGACGATACCCGGCGAGGGGATT<br>ACGATAGTGACATCCCTCTGCACG        |
| <b>Heme<br/>Binding<br/>mutants</b> | H105F                    | CCTCGACGCCCTGTTCGACCACCTCGCC                                                    |                                                                       |
|                                     | Y135A R139A              | GGGCTCATTCTGCACGCCTACTCGGAAGCAGA<br>GGGGCTTCAGGA                                |                                                                       |

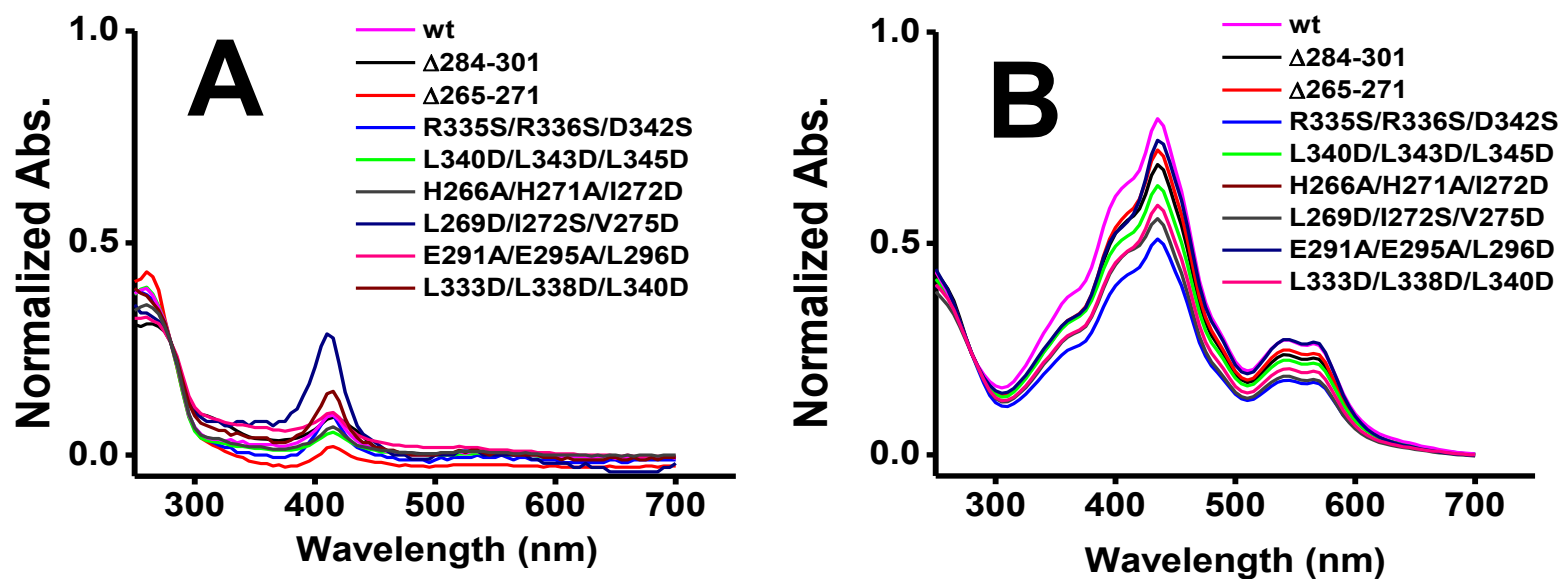

**Fig. S1.** *UV-Vis spectrum of purified recombinant sGC $\beta$ (1-358) proteins.* Spectra are normalized to the absorption values at 280 nm. *Panel A*, spectra of proteins after purification. *Panel B*, spectrum of proteins after undergoing heme reconstitution.

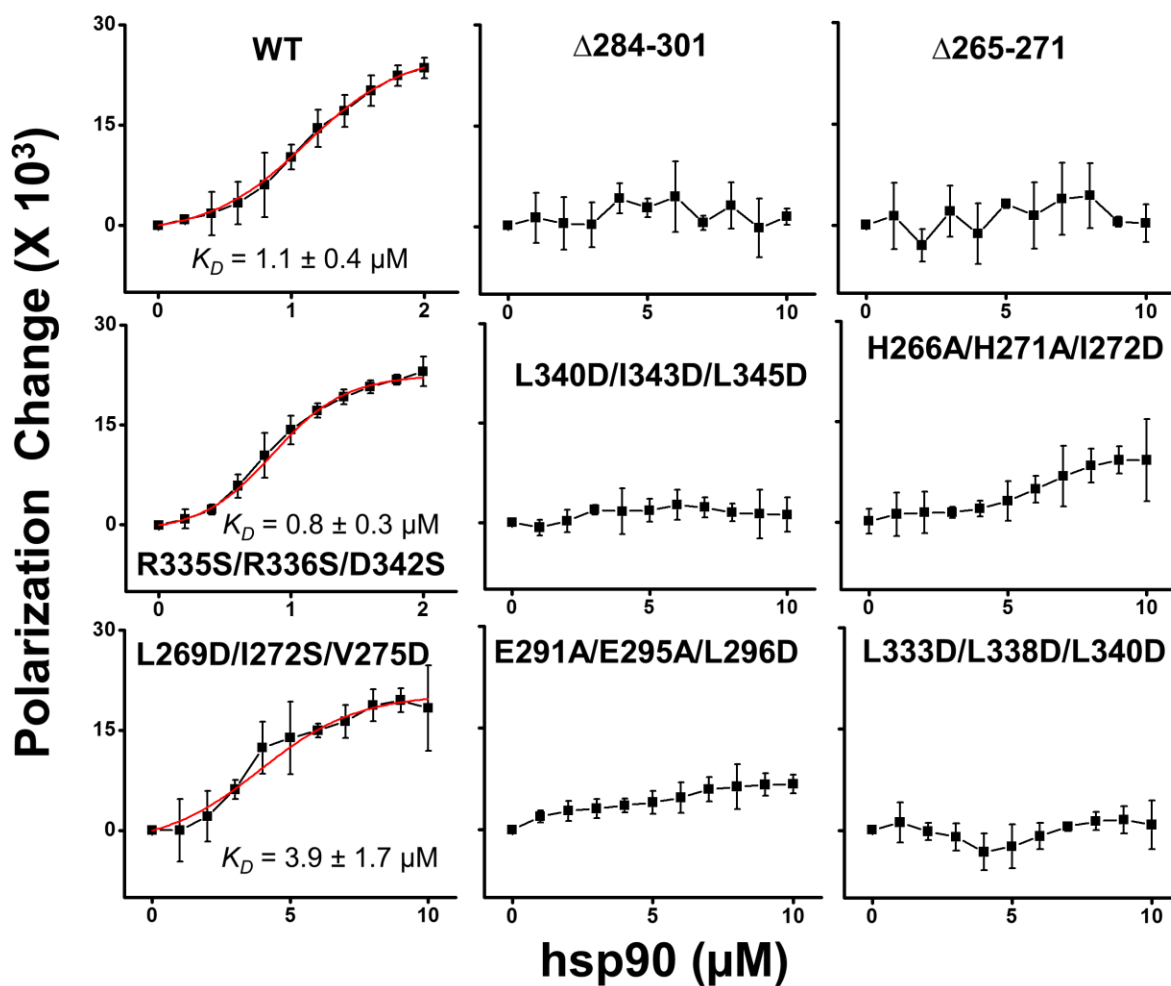

**Fig. S2. Binding interactions of purified apo-sGC $\beta$ 1(1-358) mutant proteins with FITC labeled hsp90.** Each indicated FITC-labeled hsp90 (0.5  $\mu\text{M}$ ) was titrated with increasing concentrations of sGC $\beta$  proteins and the residual polarization change was recorded and plotted. The points depict mean  $\pm$  S.D. for three samples, and are representative of two independent experiments. Red lines are computer fits derived using a single site binding equation, and gave the indicated estimates for  $k_d$ .

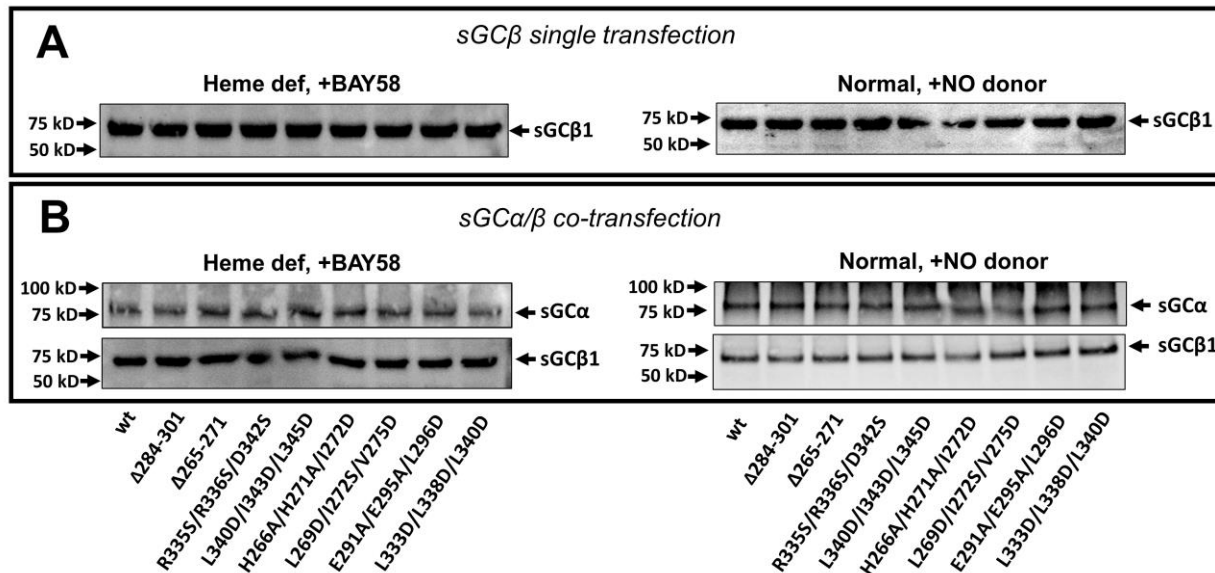

**Fig. S3. Expression levels of *sGCβ*1(1–619) proteins in cell supernatants used for guanylyl cyclase activity quantification.** Panel A shows a representative Western blot indicating expression levels of the *sGCβ* proteins in COS-7 cell that were only transfected with *sGCβ* constructs. Panel B shows a representative Western blot indicating expression levels of *sGCβ* proteins and *sGCα* in COS-7 cell that transfected with both *sGCα* and *sGCβ* constructs. The analysis used the same supernatants that were used in Fig. 5 A and B.

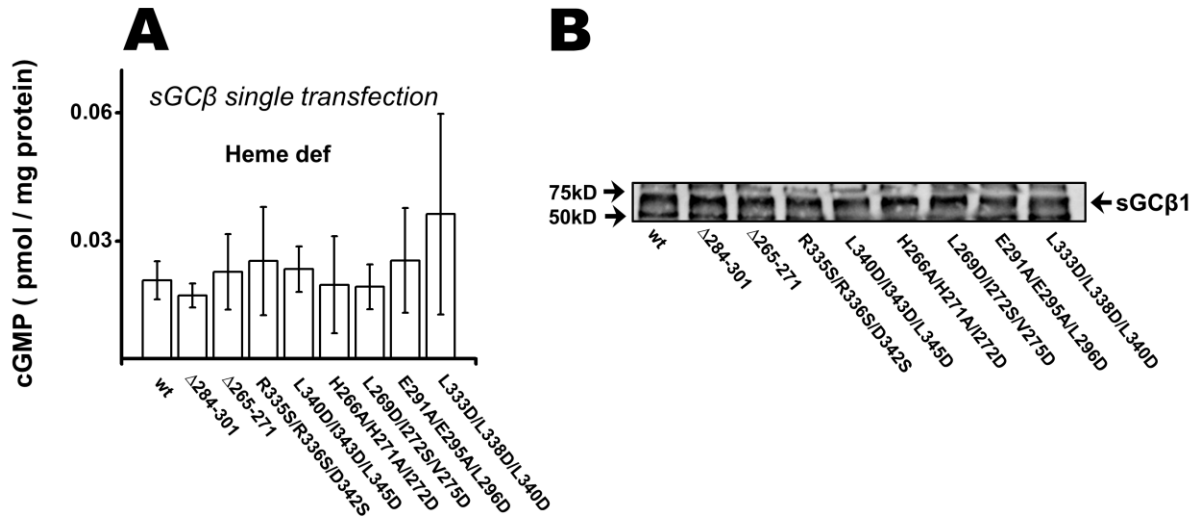

**Fig. S4. NO-dependent guanylyl cyclase activity of the *sGCβ1*(1-619)-containing supernatants from heme-depleted cells.** COS-7 cells were cultured in heme-depleted conditions (heme def) and transfected to express each *sGCβ1*(1-619) protein. Their supernatants were collected and used for GTP cyclase activity measurements in response to the NO donor NOC18. *Panel A* compares the activities. Values are the mean  $\pm$  SD of three measurements, and representative of two experiments each. *Panel B* shows a representative Western blot comparing the expression levels of the *sGCβ* proteins in the supernatants (equal protein loaded).

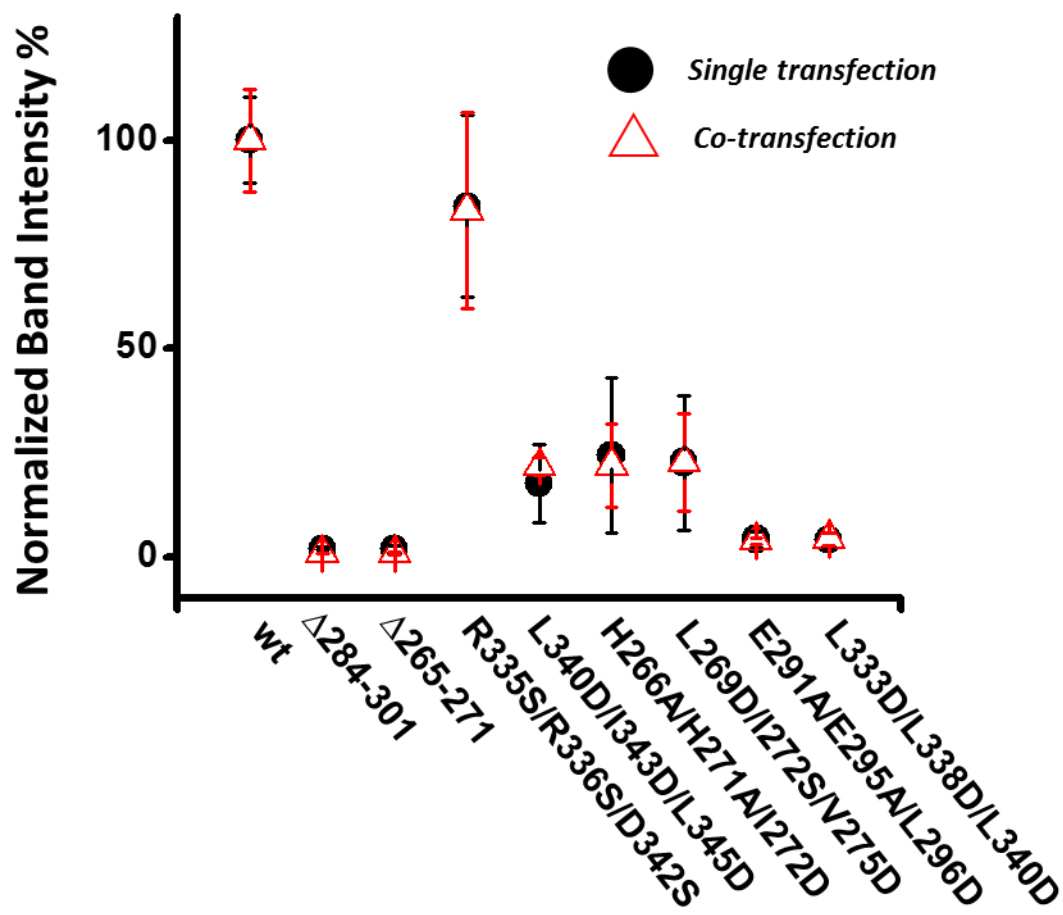

**Fig. S5. Effect of sGC $\alpha$  co-expression on the hsp90 association levels of the sGC $\beta$ 1(1-619) proteins expressed in heme-depleted cells.** The figure plots the normalized hsp90 band intensity levels that are reported in Figs. 3 and 6. Band intensities were normalized relative to the hsp90 band intensity for wild type sGC $\beta$ 1(1-619) under the two different culture conditions.
